# Supplementary material
Source: MDPI journal article supplement (https://www.mdpi.com/1999-4907/14/4/697)
Supplement: s1 [file s1]

Archive with 4 entries (4 files):
- sup data Table_S1.pdf
- sup data Table_S2.pdf
- sup data_Table_S3.pdf
- sup Table S4.xlsx
