# Supplementary material
Source: MDPI journal article supplement (https://www.mdpi.com/1999-4907/14/4/697)
Supplement: s1 [file s1 › sup data Table_S1.pdf]

## Supplementary material

**Table S1.** Growth, carbon allocation and traits of carbon acquisition in seedlings of *C. spinosum*, *G. officinale* and *G. fragrans*. For each trait, different alphabetic designations indicate significant differences between means  $\pm$ SE values ( $P < 0.05$ ).

|                                              | <i>Citharexylum spinosum</i> |             |   | <i>Guaiacum officinale</i> |             |   | <i>Guapira fragrans</i> |             |    |
|----------------------------------------------|------------------------------|-------------|---|----------------------------|-------------|---|-------------------------|-------------|----|
| RGR ( $\text{g g}^{-1} \text{wk}^{-1}$ )     | 0.303                        | $\pm$ 0.007 | a | 0.026                      | $\pm$ 0.006 | b | 0.195                   | $\pm$ 0.020 | c  |
| Individual biomass (g)                       | 23.06                        | $\pm$ 5.65  | a | 0.38                       | $\pm$ 0.03  | b | 1.45                    | $\pm$ 0.53  | c  |
| Seed mass (g)                                | 0.14                         | $\pm$ 0.02  | a | 0.24                       | $\pm$ 0.03  | b | 0.04                    | $\pm$ 0.00  | c  |
| Leaf mass fraction (%)                       | 31.2                         | $\pm$ 5.8   | a | 64.4                       | $\pm$ 0.1   | b | 37.3                    | $\pm$ 2.0   | a  |
| Stem mass fraction (%)                       | 34.8                         | $\pm$ 1.0   | a | 24.6                       | $\pm$ 0.9   | b | 39.3                    | $\pm$ 2.8   | a  |
| Root mass fraction (%)                       | 34.0                         | $\pm$ 4.9   | a | 10.9                       | $\pm$ 0.8   | b | 23.5                    | $\pm$ 1.3   | ab |
| Shoot/root ratio                             | 2.21                         | $\pm$ 0.49  | a | 8.31                       | $\pm$ 0.65  | b | 3.30                    | $\pm$ 0.25  | a  |
| Plant height (cm)                            | 81                           | $\pm$ 2     | a | 8                          | $\pm$ 1     | b | 33                      | $\pm$ 1     | c  |
| Collar diameter (mm)                         | 19                           | $\pm$ 4     | a | 6                          | $\pm$ 1     | b | 7                       | $\pm$ 0     | b  |
| Leaf initiation rate ( $\text{n day}^{-1}$ ) | 0.416                        | $\pm$ 0.025 | a | 0.084                      | $\pm$ 0.002 | b | 0.275                   | $\pm$ 0.063 | c  |
| Total plant LA ( $\text{cm}^2$ )             | 2627                         | $\pm$ 7     | a | 69                         | $\pm$ 0     | b | 222                     | $\pm$ 2     | c  |
| LA ( $\text{cm}^2$ )                         | 55.0                         | $\pm$ 3.5   | a | 2.0                        | $\pm$ 0.3   | b | 9.0                     | $\pm$ 0.7   | b  |
| SLA ( $\text{cm}^2 \text{g}^{-1}$ )          | 179                          | $\pm$ 15    | a | 138                        | $\pm$ 6     | a | 173                     | $\pm$ 6     | a  |
