# Supplementary material
Source: MDPI journal article supplement (https://www.mdpi.com/1999-4907/14/4/697)
Supplement: s1 [file s1 › sup data Table_S2.pdf]

## Supplementary material

Table S2 Correlation matrix (Pearson coefficient) between relative growth rate and a number of leaf traits (1st table) , and between relative growth rate, 50 percent of loss conductance (P50) and P-V curve parameters (2nd table). LA<sub>tot</sub> is the total leaf area of a single individual plant, and A<sub>tot</sub> is the total assimilation rate for a plant at light saturation. The meanings of the other abbreviations (LIR, SLA, LA, RGR, LMF,  $\pi_o$ ,  $\Psi_{TLP}$ ,  $\varepsilon$ , P50) can be found in Table 1. The numbers in the matrices are the respective R<sup>2</sup> values, indicated in bold when the correlation is significant (\*  $p < 0.05$ , \*\*  $p < 0.01$ , \*\*\*  $p < 0.001$ )

| Variables         | LIR      | LA <sub>tot</sub> | SLA            | LA              | A <sub>tot</sub> | RGR             | LMF             |
|-------------------|----------|-------------------|----------------|-----------------|------------------|-----------------|-----------------|
| LIR               | <b>1</b> | <b>0.793***</b>   | <b>0.715**</b> | <b>0.917***</b> | <b>0.764**</b>   | <b>0.945***</b> | <b>0.761**</b>  |
| LA <sub>tot</sub> |          | <b>1</b>          | 0.418          | <b>0.938***</b> | <b>0.969***</b>  | <b>0.715**</b>  | <b>0.648**</b>  |
| SLA               |          |                   | <b>1</b>       | <b>0.496*</b>   | 0.414            | <b>0.875***</b> | <b>0.871***</b> |
| LA                |          |                   |                | <b>1</b>        | <b>0.902***</b>  | <b>0.642*</b>   | <b>0.638**</b>  |
| A <sub>tot</sub>  |          |                   |                |                 | <b>1</b>         | <b>0.699**</b>  | <b>0.680**</b>  |
| RGR               |          |                   |                |                 |                  | <b>1</b>        | <b>0.904***</b> |
| LMF               |          |                   |                |                 |                  |                 | <b>1</b>        |

| Variables     | RGR      | $\pi_o$         | $\Psi_{TLP}$    | $\varepsilon$   | P50           |
|---------------|----------|-----------------|-----------------|-----------------|---------------|
| RGR           | <b>1</b> | <b>0.875***</b> | <b>0.879***</b> | <b>0.824***</b> | 0.315         |
| $\pi_o$       |          | <b>1</b>        | <b>0.998***</b> | <b>0.904***</b> | <b>0.542*</b> |
| $\Psi_{TLP}$  |          |                 | <b>1</b>        | <b>0.882***</b> | <b>0.521*</b> |
| $\varepsilon$ |          |                 |                 | <b>1</b>        | <b>0.466*</b> |
| P50           |          |                 |                 |                 | <b>1</b>      |
