# Supplementary material
Source: MDPI journal article supplement (https://www.mdpi.com/1999-4907/14/4/697)
Supplement: s1 [file s1 › sup data_Table_S3.pdf]

## Supplementary material

**Table S3** Plant characteristics with respect to water relations: wood, stomatal, and hydraulic traits and pressure-volume parameters. Parameters derived from the pressure-volume curves:  $\pi_o$  (osmotic potential at full turgor),  $\Psi_{TLP}$  (water potential at turgor loss point), RWCTLP (relative water content at turgor loss point) and  $\varepsilon$  (elasticity modulus). Parameters estimated from the function fitted to the vulnerability curves:  $s$  (slope of sigmoid model for vulnerability curve), P50 (the water potential at 50% cavitation), and  $R^2$  (correlation coefficient of the fit). For each trait, different alphabetic designations indicate significant differences between means  $\pm$ SE values ( $P < 0.05$ ).

|                                                           | <i>Citharexylum<br/>spinosum</i> | <i>Guaiacum officinale</i> | <i>Guapira fragrans</i> |
|-----------------------------------------------------------|----------------------------------|----------------------------|-------------------------|
| SWD (g cm <sup>-3</sup> )                                 | 0.51 ± 0.03 a                    | 0.68 ± 0.15 a              | 0.38 ± 0.02 b           |
| SWC (%)                                                   | 86 ± 12 a                        | 92 ± 33 ab                 | 153 ± 13 b              |
| Hv (x10 <sup>-4</sup> )                                   | 0.73 ± 0.02 a                    | 3.62 ± 0.20 b              | 0.66 ± 0.11 a           |
| gS <sub>max</sub> (mmol m <sup>-2</sup> s <sup>-1</sup> ) | 60.0 ± 2.1 a                     | 97.4 ± 0.8 b               | 77.6 ± 0.6 ab           |
| Stomatal density (Nb mm <sup>-2</sup> )                   | 111 ± 24 a                       | 292 ± 47 b                 | 105 ± 24 a              |
| Ostiole length (µm)                                       | 21 ± 2 ab                        | 16 ± 1 a                   | 28 ± 3 b                |
| π <sub>0</sub> (MPa)                                      | -<br>1.17 ± 0.04 a               | -2.79 ± 0.21 b             | -1.47 ± 0.05 a          |
| Ψ <sub>TLP</sub> (MPa)                                    | -<br>1.30 ± 0.05 a               | -3.04 ± 0.23 b             | -1.66 ± 0.06 a          |
| RWC <sub>TLP</sub> (%)                                    | 90.1 ± 0.4 a                     | 91.8 ± 0.4 a               | 90.3 ± 1.4 a            |
| ε (MPa)                                                   | 10.9 ± 0.7 a                     | 32.7 ± 2.3 b               | 15.82 ± 2.6 a           |
| S (% MPa <sup>-1</sup> )                                  | 7.0 ± 1.4                        | 13.2 ± 1.2                 | 8.2 ± 2.8               |
| P <sub>50</sub> (MPa)                                     | -4.2 ± 0.5                       | -4.5 ± 0.3                 | -3.9 ± 0.6              |
| R <sup>2</sup>                                            | 0.66                             | 0.01                       | 0.28                    |
| HSM (MPa)                                                 | 2.9                              | 1.46                       | 2.24                    |
