# Supplementary material
Source: MDPI journal article supplement (https://www.mdpi.com/1999-4907/14/4/697)
Supplement: s1 [file s1 › sup Table S4.xlsx]

## Sheet: dataset_description
Sheet "traits"	Value of traits for each individual of the three species in study
Name of traits	Descritption	Unit
SLA	Specific leaf area (leaf area/plant mass)	cm² g-1
LA	Leaf area unit	cm²
Ds	Stomatal density	N m-2
Hv	Huber value (sapwood area/leaf area)	(x10-4) cm-2 cm-2
LIR	Leaf initiation rate	n day-1
gs	Stomatal conductance	mmol m-2 s-1
Leaf biomass	Biomass of leaves of the individual	g
Root biomass	Biomass of roots	g
Stem biomass	Biomass of stem	g
SWC	Stem water content	%
SWD	Stem wood density	g cm-3
RGR	Relative growth rate	g g-1 wk-1
Diurnal transpiration	Water loss through transpiration during the day	g cm-² h-1
Nocturnal transpiration	Water loss through transpiration during the night	g cm-² h-1
Height	Plant height at the end of the experiment	cm
Sheet "vulnerability to embolism"	Synthetic data obtained from hydraulic conductivity measurement
Name of traits	Descritption	Unit
Ψ	Water potential	Mpa
P50	Pressure causing 50% loss of conductance	MPa
Sheet "A_PPFD"	photosynthesis response curves to light variation
Name of traits	Descritption	Unit
A	Rate of carbon assimilation	mmol m-2 s-1
PPFD	Photosynthetic photon flux density	µmol (photon) m-2 s-1
Sheet "A_T"	photosynthesis response curves to temperature variation
Name of traits	Descritption	Unit
A	Rate of carbon assimilation	mmol m-2 s-1
T	Temperature	°C
Sheet "pressure volume curves"	Leaf water content and hydric potential during the dessication protocol
Name of traits	Descritption	Unit
Ψ	Water potential	Mpa
limbe leaf water	mass of water contained in the limbe of the leaf.	g

## Sheet: traits
Species	SLA	LA	Ds	Hv	LIR	gs	leaf mass	stem biomass	root biomass	SWC	WD	Height	Diurnal transpiration	Nocturnal transpiration	Seed mass	πo	ΨTLP	ε
Citharexylum spinosum	187.331	72.08	120.06	0.725888	0.47541	66	11.4117	11.319	9.607	79.3379	0.563281	61	0.00381814	0.000467794	0.185	-1.17646	-1.3277	11.1465
Citharexylum spinosum	112.484	56.326	78.99	0.697286	0.42623	92	5.24238	12.261	15.436	68.774	0.481393	82.3	0.00165176	0.000910531	0.209	-1.10302	-1.2116	9.67676
Citharexylum spinosum	161.724	80.988	110.58	0.761229	0.409836	91.6667	5.87747	10.235	12.26	136.689	0.398802	87	0.00148101	0.000340431	0.194	-1.22872	-1.36293	11.8788
Citharexylum spinosum	132.109	64.478	135.86		0.352459	81.8462	6.74164	6.44839	5.609	58.6881	0.610645	78.7	0.00182346	0.000510569	0.214
Citharexylum spinosum	393.853	39.28				26.7778	1.37264	0.88673	0.57885			79	0.00192768	0.000318618	0.199
Citharexylum spinosum	130.075	24.19				41.375									0.22
Citharexylum spinosum	187.357	14.79				27									0.076
Citharexylum spinosum	101.956	47.22													0.061
Citharexylum spinosum	100.269	40.98													0.064
Citharexylum spinosum	166.301	40.03													0.068
Citharexylum spinosum	177.29	28.19													0.078
Citharexylum spinosum	161.121	41.16
guaiacum officinale	142.931	1.064	325.42	3.54383	0.0819672	121.333	0.17734	0.07125	0.0277	114.385	0.438618	6.7	0.00254465	0.00289601	0.1656	-2.87006	-3.11172	32.0767
guaiacum officinale	155.362	2.264	236.96	3.99387	0.0901639	134.444	0.2523	0.08836	0.04929	77.8837	0.854136	6.1	0.00159087	0.00212116	0.1875	-3.11581	-3.40269	37.0472
guaiacum officinale	171.421	1.708	268.77	3.3106	0.0819672	88.2222	0.26632	0.10912	0.03739	98.4135	0.554009	7.4	0.00257823	0.00183341	0.2033	-2.38994	-2.61477	29.0126
guaiacum officinale	128.499	1.402	334.9		0.0819672	107.583	0.29558	0.10893	0.05545			8.2	0.00477782	0.000451004	0.141
guaiacum officinale	91.2787	8.98				143.727						11.1	0.00245986	0.000387379	0.0943
guaiacum officinale	83.4135	3.47				61.5
guaiacum officinale	114.588	2.38				81.6
guaiacum officinale	89.4495	4.68				84.3333
guaiacum officinale	81.4196	2.73
Guapira fragrans	199.052	7.51	120.06	0.476799	0.172131	75.25	0.24185	0.20125	0.15502	100.458	0.483024	32.5	0.00365323	0.000485076	0.0272	-1.52019	-1.69896	15.9848
Guapira fragrans	180.079	8.898	120.06	0.848675	0.237705	124.444	0.4786	0.63558	0.35903	178.328	0.339614	37.5	0.0079169	0.000400518	0.0429	-1.4385	-1.54909	22.9341
Guapira fragrans	149.316	7.395	69.51	0.640927	0.229508	97	0.31829	0.27625	0.18404	133.22	0.371898	29.3	0.000719256	0.00163264	0.0416	-1.57246	-1.80878	13.6176
Guapira fragrans	166.54	7.335	110.58		0.459016	60.3636	1.03515	1.31816	0.58499	201.609	0.312053	30	0.00950347	0.000330555	0.0505	-1.34275	-1.56428	10.7595
Guapira fragrans	179.918	15.41				54.3						35	0.00564183	0.00127639	0.0447
Guapira fragrans	204.649	9.86													0.0439
Guapira fragrans	97.0549	11.6													0.0256
Guapira fragrans	166.864	10.345													0.0463
Guapira fragrans	169.654	12.59													0.0388
Guapira fragrans	214.334	8.885													0.0316
Guapira fragrans	166.967	5.56													0.0336
															0.0446
															0.0491
															0.0471
															0.0459

## Sheet: vulnerability_embolism
Species	Ψ	PLC
Citharexylum spinosum	0.3	5.36096
Citharexylum spinosum	1.08333	29.809
Citharexylum spinosum	1.7	27.2843
Citharexylum spinosum	1.7	24.571
Citharexylum spinosum	2.5	45.0399
Citharexylum spinosum	0.433333	26.5617
Citharexylum spinosum	0.5	10.638
Citharexylum spinosum	4.76667	46.8434
Citharexylum spinosum	3.63333	60.3297
Citharexylum spinosum	2.26667	29.6203
Citharexylum spinosum	5.8	60.1127
Citharexylum spinosum	4	60.7241
Citharexylum spinosum	6.13333	60.0318
Citharexylum spinosum	7.87	74.464
Citharexylum spinosum	5.99667	56.9216
Citharexylum spinosum	16.7333	80.7113
Citharexylum spinosum	9.87	68.0715
Citharexylum spinosum	0.466667	22.9733
Citharexylum spinosum	2.06667	45.1689
Citharexylum spinosum	1.88333	22.512
Citharexylum spinosum	0.716667	21.9178
Citharexylum spinosum	2.83333	67.9868
Citharexylum spinosum	2.3	70.8598
Citharexylum spinosum	0.416667	18.5314
Citharexylum spinosum	3.16667	40.658
Guapira fragrans	0.72	64.3402
Guapira fragrans	5.66667	51.4286
Guapira fragrans	1.37667	37.0713
Guapira fragrans	0.183333	3.49393
Guapira fragrans	1.95
Guapira fragrans	1.39667	40.8977
Guapira fragrans	0.55	5.18167
Guapira fragrans	2.3	40.9246
Guapira fragrans	2.06667	33.2219
Guapira fragrans	3.73333	52.6223
Guapira fragrans	0.216667	7.0542
Guapira fragrans	2.5	33.7662
Guapira fragrans	2.58333	40.0821
Guapira fragrans	2.51667	34.8262
Guapira fragrans	2.2	35.6481
Guapira fragrans	0
Guapira fragrans	4.36667	69.2762
Guapira fragrans	3.2	66.3582
Guapira fragrans	2.83333	34.6831
Guapira fragrans	3.71667
Guapira fragrans	3.64667	34.9922
Guapira fragrans	4.16667	44.8192
Guaiacum officinale	3.16	41.5646
Guaiacum officinale	0.85	14.7456
Guaiacum officinale	4.7	49.2272
Guaiacum officinale	0
Guaiacum officinale	0
Guaiacum officinale	1.38333	28.8676
Guaiacum officinale	1.38333	28.8676
Guaiacum officinale	1.3	37.0462
Guaiacum officinale	1.3	37.0462
Guaiacum officinale	4.04	52.5307
Guaiacum officinale	4.04	52.5307
Guaiacum officinale	1.91667
Guaiacum officinale	1.91667
Guaiacum officinale	2.02333	14.0355
Guaiacum officinale	2.02333	14.0355
Guaiacum officinale	3.08	16.3366
Guaiacum officinale	3.08	16.3366
Guaiacum officinale	2.24	18.5769
Guaiacum officinale	2.24	18.5769
Guaiacum officinale	5.262	30.9738
Guaiacum officinale	5.262	30.9738
Guaiacum officinale	2.05333	27.9786
Guaiacum officinale	2.05333	27.9786
Guaiacum officinale	9.78	25.0422
Guaiacum officinale	9.78	25.0422
Guaiacum officinale	8.49	28.2479
Guaiacum officinale	8.49	28.2479
Guaiacum officinale	9.05	31.986
Guaiacum officinale	9.05	31.986
Guaiacum officinale	11.095	23.9824
Guaiacum officinale	11.095	23.9824
Guaiacum officinale	6.98667	43.4729

## Sheet: A_PPFD
Species	replicate	PPFD	A
Citharexylum spinosum	1	0	-1.5
Citharexylum spinosum	1	50	0.2
Citharexylum spinosum	1	100	1.3
Citharexylum spinosum	1	200	3
Citharexylum spinosum	1	500	4.3
Citharexylum spinosum	1	750	4.5
Citharexylum spinosum	1	1000	4.5
Citharexylum spinosum	1	1500	4.5
Citharexylum spinosum	1	2000	4.5
Citharexylum spinosum	2	0	-1
Citharexylum spinosum	2	50	1
Citharexylum spinosum	2	100	2.1
Citharexylum spinosum	2	200	4
Citharexylum spinosum	2	500	5.9
Citharexylum spinosum	2	750	6
Citharexylum spinosum	2	1000	6
Citharexylum spinosum	2	1500	6
Citharexylum spinosum	2	2000	6
Citharexylum spinosum	3	0	-2
Citharexylum spinosum	3	50	-0.4
Citharexylum spinosum	3	100	0.55
Citharexylum spinosum	3	200	2.3
Citharexylum spinosum	3	500	4.3
Citharexylum spinosum	3	750	4.65
Citharexylum spinosum	3	1000	4.16667
Citharexylum spinosum	3	1500	4.65
Citharexylum spinosum	3	2000	4.6
Guaiacum officinale	1	0	-2.5
Guaiacum officinale	1	50	0
Guaiacum officinale	1	100	1.625
Guaiacum officinale	1	200	5.125
Guaiacum officinale	1	500	8.75
Guaiacum officinale	1	750	10.25
Guaiacum officinale	1	1000	10.625
Guaiacum officinale	1	1500	11.375
Guaiacum officinale	1	2000	11.375
Guaiacum officinale	2	0	-2
Guaiacum officinale	2	50	-0.1
Guaiacum officinale	2	100	1.1
Guaiacum officinale	2	200	3.7
Guaiacum officinale	2	500	6.6
Guaiacum officinale	2	750	7.4
Guaiacum officinale	2	1000	8
Guaiacum officinale	2	1500	8.1
Guaiacum officinale	2	2000	8.3
Guaiacum officinale	3	0	-2.96875
Guaiacum officinale	3	50	-0.15625
Guaiacum officinale	3	100	1.46875
Guaiacum officinale	3	200	4.59375
Guaiacum officinale	3	500	7.90625
Guaiacum officinale	3	750	8.6875
Guaiacum officinale	3	1500	11.125
Guaiacum officinale	3	2000	11.125
Guapira fragrans	1	0	-2.4
Guapira fragrans	1	50	-0.1
Guapira fragrans	1	100	1.2
Guapira fragrans	1	200	3
Guapira fragrans	1	500	4.5
Guapira fragrans	1	750	4.9
Guapira fragrans	1	1000	5.2
Guapira fragrans	1	1500	5.7
Guapira fragrans	1	2000	5.7
Guapira fragrans	2	0	-0.8
Guapira fragrans	2	50	1.2
Guapira fragrans	2	100	2.7
Guapira fragrans	2	200	5.3
Guapira fragrans	2	500	8.6
Guapira fragrans	2	750	9
Guapira fragrans	2	1000	9.3
Guapira fragrans	2	1500	9.8
Guapira fragrans	2	2000	9.7
Guapira fragrans	3	0	-3.6
Guapira fragrans	3	50	-1
Guapira fragrans	3	100	0.3
Guapira fragrans	3	200	3
Guapira fragrans	3	500	4.8
Guapira fragrans	3	750	5.2
Guapira fragrans	3	1000	5.5
Guapira fragrans	3	1500	5.6
Guapira fragrans	3	2000	5.6

## Sheet: A_T
Pecies	Replicate	T	A
Guaiacum officinale	1	26.3	11.8
Guaiacum officinale	1	23.7	11.3
Guaiacum officinale	1	20.7	10.3
Guaiacum officinale	1	17.1	7.7
Guaiacum officinale	1	28.4	11.7
Guaiacum officinale	1	32.5	11.7
Guaiacum officinale	1	37.7	10
Guaiacum officinale	1	42.4	8.2
Guaiacum officinale	1	46.4	2.6
Guaiacum officinale	2	28.4	10
Guaiacum officinale	2	28.4	10.2
Guaiacum officinale	2	22.6	9.6
Guaiacum officinale	2	19.7	8.7
Guaiacum officinale	2	16.3	6.3
Guaiacum officinale	2	28.4	9.8
Guaiacum officinale	2	34.5	9.7
Guaiacum officinale	2	36.8	8
Guaiacum officinale	2	38.2	7
Guaiacum officinale	2	37.3	6.5
Guaiacum officinale	2	40.9	2.3
Guaiacum officinale	2	48.2	-0.5
Guapira fragrens	1	28.5	8.4
Guapira fragrens	1	17.6	4.2
Guapira fragrens	1	19.9	5.5
Guapira fragrens	1	22.8	7
Guapira fragrens	1	28.4	8.5
Guapira fragrens	1	32.5	8.6
Guapira fragrens	1	36.3	8.4
Guapira fragrens	1	39.7	8.3
Guapira fragrens	1	41.3	6.8
Guapira fragrens	1	47.1	3.2
Guapira fragrens	1	49	1.2
Guapira fragrens	2	26.8	6.3
Guapira fragrens	2	22.9	5
Guapira fragrens	2	19.8	4.2
Guapira fragrens	2	17.7	3.2
Guapira fragrens	2	26.8	5.4
Guapira fragrens	2	30	5.7
Guapira fragrens	2	37.1	5.7
Guapira fragrens	2	40.2	3
Guapira fragrens	2	42.1	0.4
Guapira fragrens	3	28.7	7.2
Guapira fragrens	3	22.9	5.9
Guapira fragrens	3	19.9	4.2
Guapira fragrens	3	18.9	3.5
Guapira fragrens	3	28.4	8
Guapira fragrens	3	33	7.6
Guapira fragrens	3	36.6	7.8
Guapira fragrens	3	44.1	7.1
Guapira fragrens	3	48.4	3.6
Citharexylon	1	24.8	6.3
Citharexylon	1	21.9	5.8
Citharexylon	1	18.3	5.1
Citharexylon	1	18.4	4.7
Citharexylon	1	25.4	6.6
Citharexylon	1	28.9	7.2
Citharexylon	1	33.6	6.7
Citharexylon	1	38.8	4
Citharexylon	1	45.9	1.8
Citharexylon	2	22.9	5.1
Citharexylon	2	19.6	4
Citharexylon	2	18.2	3.5
Citharexylon	2	22.6	5.1
Citharexylon	2	28.2	6.4
Citharexylon	2	34.2	6.6
Citharexylon	2	39	5.5
Citharexylon	2	44.6	2.4
Citharexylon	3	26.6	6.8
Citharexylon	3	22.6	6
Citharexylon	3	18.8	5.1
Citharexylon	3	18.9	5.3
Citharexylon	3	25.6	6.8
Citharexylon	3	27.9	7.3
Citharexylon	3	34.4	7.3
Citharexylon	3	40.2	6.4
Citharexylon	3	45.4	3.5
Guaiacum officinale	3	28.4	9
Guaiacum officinale	3	23	7.4
Guaiacum officinale	3	19.7	4.3
Guaiacum officinale	3	19.9	4.2
Guaiacum officinale	3	28	8.9
Guaiacum officinale	3	33.9	9.4
Guaiacum officinale	3	38.9	5.7
Guaiacum officinale	3	38.7	4.5
Guaiacum officinale	3	44.6	0.2

## Sheet: pressure-volume curves
Species	replicate	Ψ	limbe leaf water
Citharexylum spinosum	1	-0.5	0.53161
Citharexylum spinosum	1	-0.7	0.52338
Citharexylum spinosum	1	-0.9	0.51221
Citharexylum spinosum	1	-1.1	0.50873
Citharexylum spinosum	1	-1.3	0.49555
Citharexylum spinosum	1	-1.5	0.45415
Citharexylum spinosum	1	-1.7	0.4029
Citharexylum spinosum	1	-2	0.33585
Citharexylum spinosum	2	-0.8	0.40077
Citharexylum spinosum	2	-1.1	0.38877
Citharexylum spinosum	2	-1.4	0.34677
Citharexylum spinosum	2	-2	0.25577
Citharexylum spinosum	2	-2.5	0.19077
Citharexylum spinosum	2	-3	0.12577
Citharexylum spinosum	2	-3.5	0.04477
Guapira fragrans	1	-0.4	0.38743
Guapira fragrans	1	-0.7	0.37768
Guapira fragrans	1	-1	0.37333
Guapira fragrans	1	-1.3	0.36898
Guapira fragrans	1	-1.6	0.3592
Guapira fragrans	1	-1.9	0.33449
Guapira fragrans	1	-2.2	0.30928
Guapira fragrans	1	-4	0.17354
Guapira fragrans	2	-0.3	0.86651
Guapira fragrans	2	-0.6	0.85312
Guapira fragrans	2	-0.9	0.8471
Guapira fragrans	2	-1.1	0.83636
Guapira fragrans	2	-1.3	0.8308
Guapira fragrans	2	-1.5	0.8235
Guapira fragrans	2	-1.8	0.76203
Guapira fragrans	2	-2.1	0.64207
Guapira fragrans	2	-2.4	0.56752
Guapira fragrans	3	-0.5	0.54114
Guapira fragrans	3	-0.8	0.52817
Guapira fragrans	3	-1.1	0.52114
Guapira fragrans	3	-1.3	0.51657
Guapira fragrans	3	-1.5	0.50795
Guapira fragrans	3	-1.8	0.49192
Guapira fragrans	3	-2.1	0.43282
Guapira fragrans	3	-2.5	0.3672
Guapira fragrans	3	-3	0.31188
Guapira fragrans	4	-0.2	0.89255
Guapira fragrans	4	-0.6	0.84987
Guapira fragrans	4	-0.9	0.83549
Guapira fragrans	4	-1.2	0.81876
Guapira fragrans	4	-1.5	0.7966
Guapira fragrans	4	-1.8	0.73848
Guapira fragrans	4	-2.5	0.58903
Guapira fragrans	4	-3	0.4653
Citharexylum spinosum	3	-0.6	1.55
Citharexylum spinosum	3	-0.8	1.539
Citharexylum spinosum	3	-1	1.51
Citharexylum spinosum	3	-1.2	1.48
Citharexylum spinosum	3	-1.4	1.392
Citharexylum spinosum	3	-1.6	1.242
Citharexylum spinosum	3	-1.8	1.058
Citharexylum spinosum	3	-2	0.876
guaiacum officinale	2	-2	0.42412
guaiacum officinale	2	-2.5	0.42312
guaiacum officinale	2	-3	0.41412
guaiacum officinale	2	-3.5	0.37812
guaiacum officinale	2	-4	0.34212
guaiacum officinale	2	-4.5	0.29312
guaiacum officinale	2	-5	0.24812
guaiacum officinale	3	-0.5	0.271
guaiacum officinale	3	-1	0.267
guaiacum officinale	3	-1.5	0.263
guaiacum officinale	3	-2	0.26
guaiacum officinale	3	-2.5	0.253
guaiacum officinale	3	-3	0.226
guaiacum officinale	3	-3.6	0.198
guaiacum officinale	3	-4	0.178
guaiacum officinale	3	-4.5	0.149
guaiacum officinale	3	-5	0.126
guaiacum officinale	1	-2	0.35803
guaiacum officinale	1	-2.5	0.35703
guaiacum officinale	1	-3	0.34803
guaiacum officinale	1	-3.5	0.31203
guaiacum officinale	1	-4	0.27603
guaiacum officinale	1	-4.5	0.22703
guaiacum officinale	1	-5	0.18203
